# Supplementary material for: Handling electric connections in 3D-printed electrodes and sensors. Part II. Instrumentation
Source: Research Square preprint supplement (doi:10.21203/rs.3.rs-5968125/v1), 2025-02-13
Supplement: Supplementary file 1 [file bf479542dac1d3ee993976db.docx]

# Handling electric connections in 3D-printed electrodes and sensors. Part II. Instrumentation

Thawan Gomes de Oliveira, Ivan Verlangieri, Fernando Silva Lopes, Ivano Gebhardt Rolf Gutz, Lúcio Angnes, and Claudimir Lucio do Lago*

Department of Fundamental Chemistry, Institute of Chemistry, University of São Paulo, Av. Prof. Lineu Prestes, 748, 05508-000, São Paulo – SP, Brazil

# **SUPPLEMENTARY INFORMATION (SI)**

## Bode Plot

A 10 kΩ resistor was used as a dummy cell for the potentiostatic module and a digital storage oscilloscope 2542-GEN (RIGOL, Beijing, China) was used to apply a sinusoidal 1 Vpeak at the input and record the output of the module. The filter capacitor C3 was a 22 pF 50 V ceramic capacitor used just to prevent oscillation. Therefore, the response is essentially the best that can be obtained with the proposed circuit. Figure S1 shows the experimental Bode plot for this setup, while Figure S2 shows the simulated Bode plot for the circuit with different filter capacitor. The simulation was carried out by using TINA-TI V9 (Texas Instruments, Dallas, TX).

**Figure S1**. Experimental Bode plot for the potentiostat module with C3 equal to 22 pF. This very low capacitance has been used to prevent oscillation. The blue line is the limit of -3 dB for the cutoff frequency, which was determined as 68 kHz.

100 nF

10 nF

1.0 nF

**Figure S2**. Simulated Bode plot for the potentiostat module using different values for C3. The cutoff frequency was determined as 12, 120, and 1200 Hz for 100, 10, and 1 nF, respectively.

## Design and 3D printing conditions

Table S1 shows the parameters employed for 3D-printing of the specimens.

**Table S1**. Printing parameters

| **Parameter** | **Extruder 1 (PLA Easy)** | **Extruder 2 (CB-PLA)** | **Unit** |
| --- | --- | --- | --- |
| Layer height | 0.15 | 0.15 | mm |
| Line width | 0.45 | 0.45 | mm |
| Wall line count | 3 | 3 | - |
| Layers top/bottom | 5/4 | 5/4 | - |
| Infill density | 10 | 10 | % |
| Infill pattern | Grid | Grid | - |
| Printing temperature | 210 | 195 | °C |
| Build plate temperature | 50 | 50 | °C |
| Retraction distance | 5.0 | 5.0 | mm |
| Retraction speed | 60.0 | 60.0 | mm s-1 |
| Travel avoid distance | 0.625 | 0.625 | mm |
| Z hop when retracted | Yes | Yes | - |
| Z hop only over printed parts | Yes | Yes | - |
| Z hop height | 1.0 | 1.0 | mm |
| Z hop after extruder switch | Yes | Yes | - |
| Fan speed | 100 | 100 | % |
